# Supplementary material for: Deep optoacoustic localization microangiography of ischemic stroke in mice
Source: PubMed Central journal article supplement (PMC10275987; doi:10.1038/s41467-023-39069-1), 2023-06-16
Supplement: 41467_2023_39069_MOESM3_ESM.pdf [file 41467_2023_39069_MOESM3_ESM.pdf]

## **Description of Additional Supplementary Files**

**Supplementary Movie 1.** Visualization of the flow of individual microdroplets (three-dimensional view). Differential optoacoustic (OA) image (green colormap) is superimposed to the OA image (orange colormap). Injection time point is indicated.

**Supplementary Movie 2.** Visualization of the flow of individual microdroplets (maximum intensity projections). Differential optoacoustic (OA) image (green colormap) is superimposed to the OA image (orange colormap). Injection time point is indicated.

**Supplementary Movie 3.** Localization optoacoustic tomography (LOT) image formation process. The rotating view of the localized points is shown.

**Supplementary Movie 4.** Comparison of optoacoustic tomography (OAT) and localization optoacoustic tomography (LOT). Rotating views are shown.

**Supplementary Movie 5.** Blood flow velocity map. The rotating view is shown.

**Supplementary Movie 6.** Oxygen saturation map of the mouse brain after stroke induction. The rotating view is shown.
